# Supplementary material
Source: publisher figshare collection journal article supplement (https://acs.figshare.com/ndownloader/files/3867535)
Supplement: Supplementary file 1 [file 3867535]

# Supporting Information for “Pressure-induced reactivity in the emeraldine salt and base forms of polyaniline probed by FTIR and Raman”

Marcelo M. Nobrega<sup>\*a,b</sup>, Matteo Ceppatelli<sup>b,d</sup>, Marcia L. A. Temperini<sup>a</sup>, Roberto Bini<sup>b,c</sup>

<sup>a</sup> *Departamento de Química Fundamental, Instituto de Química da Universidade de São Paulo (USP), C.P. 26077- CEP 05513-970 -São Paulo, SP, Brazil*

<sup>b</sup> *LENS, European Laboratory for Nonlinear Spectroscopy, Via Nello Carrara 1, 50019 Sesto Fiorentino (FI), Italy*

<sup>c</sup> *Dipartimento di Chimica “Ugo Schiff” dell’Università degli Studi di Firenze, Via della Lastruccia 3, 50019 Sesto Fiorentino (FI), Italy*

<sup>d</sup> *ICCOM-CNR, Institute of Chemistry of OrganoMetallic Compounds, National Research Council of Italy, Via Madonna del Piano 10, I-50019 Sesto Fiorentino, Firenze, Italy*

*E-mail address: marcelomedre@usp.br.*

## ***Raman Spectra***

Figure 1S presents the Raman spectra measured during the compression (A) – decompression (B) cycle of PANI-EB-IF at ambient temperature (298 K). The characteristic bands of PANI-EB-IF at ambient pressure are due to the quinoid segments at 1590 ( $\nu_{C-C}$ ), 1470 ( $\nu_{C=N}$ ), 1218 ( $\nu_{C-N}$ ) and 1164 ( $\beta_{C-H}$ )  $\text{cm}^{-1}$ ,<sup>1-3</sup> (Figure 2S A, bottom spectrum). The overall observed results for the Raman experiments are quite similar to the results reported for the FTIR data. Briefly, a broadening and a blue shift of the bands as the pressure increases, preceding the complete loss of the spectral features

possibly indicating a partial or complete amorphization of the polymer at  $\sim 14$  GPa. Under decompression, the amorphization is almost completely reversible and the recovered spectrum is very similar to the starting one unless a broadening of the bands likely due to the stress. However, it is important to notice that PANI-EB presents a strong resonance condition with this exciting radiation (647.1 nm) turning impossible to observe the formation of any other species during the compression-decompression cycle.

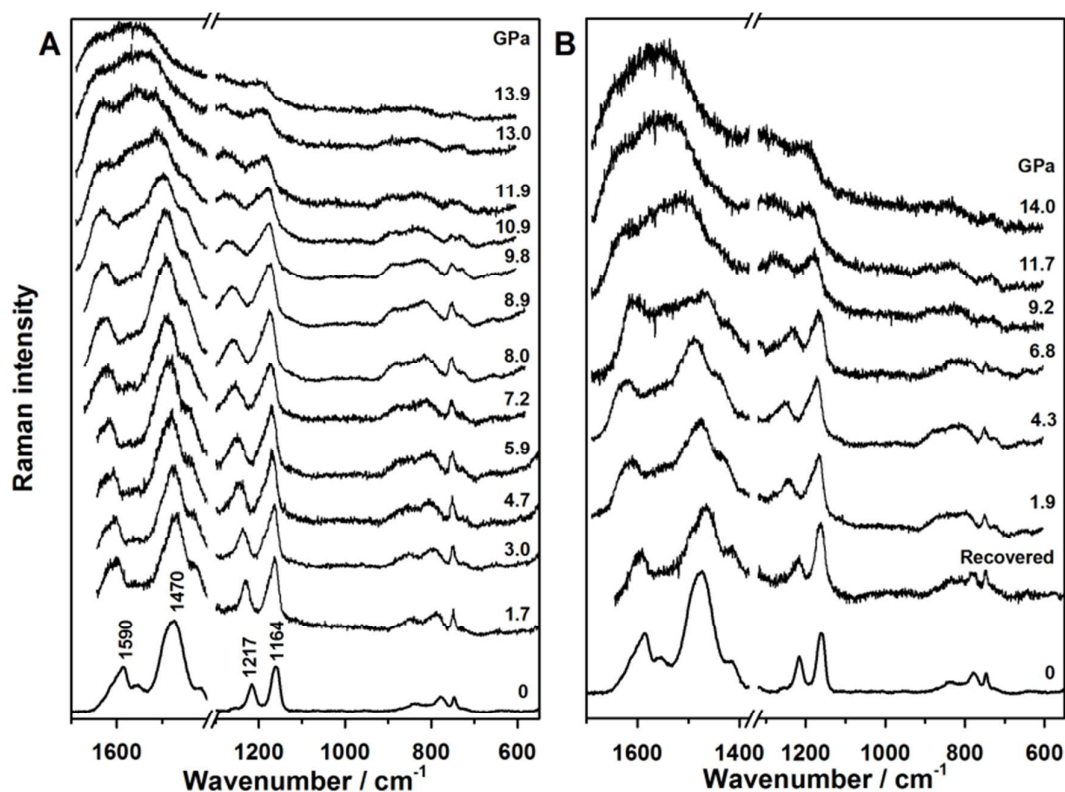

**Figure 1S.** Raman spectra of PANI-EB-IF (A) compression and (B) decompression at 298 K.

The Raman spectra of the doped and dedoped forms of PANI-bulk and PANI-RM are summarized in Figures 2S and 3S, respectively.

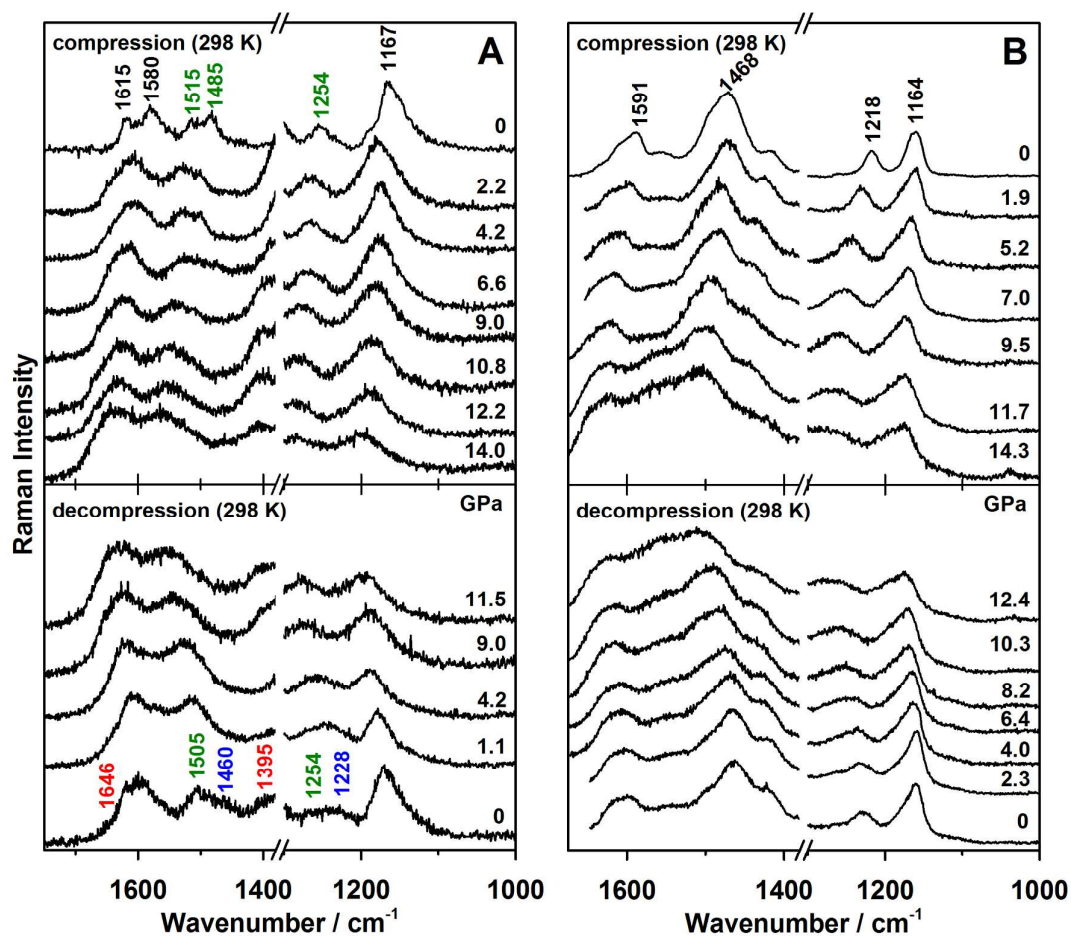

*Figure 2S. Raman spectra of PANI-ES-bulk (A) and PANI-EB-bulk (B) during the compression (upper panels) and decompression (lower panels) at 298 K.*

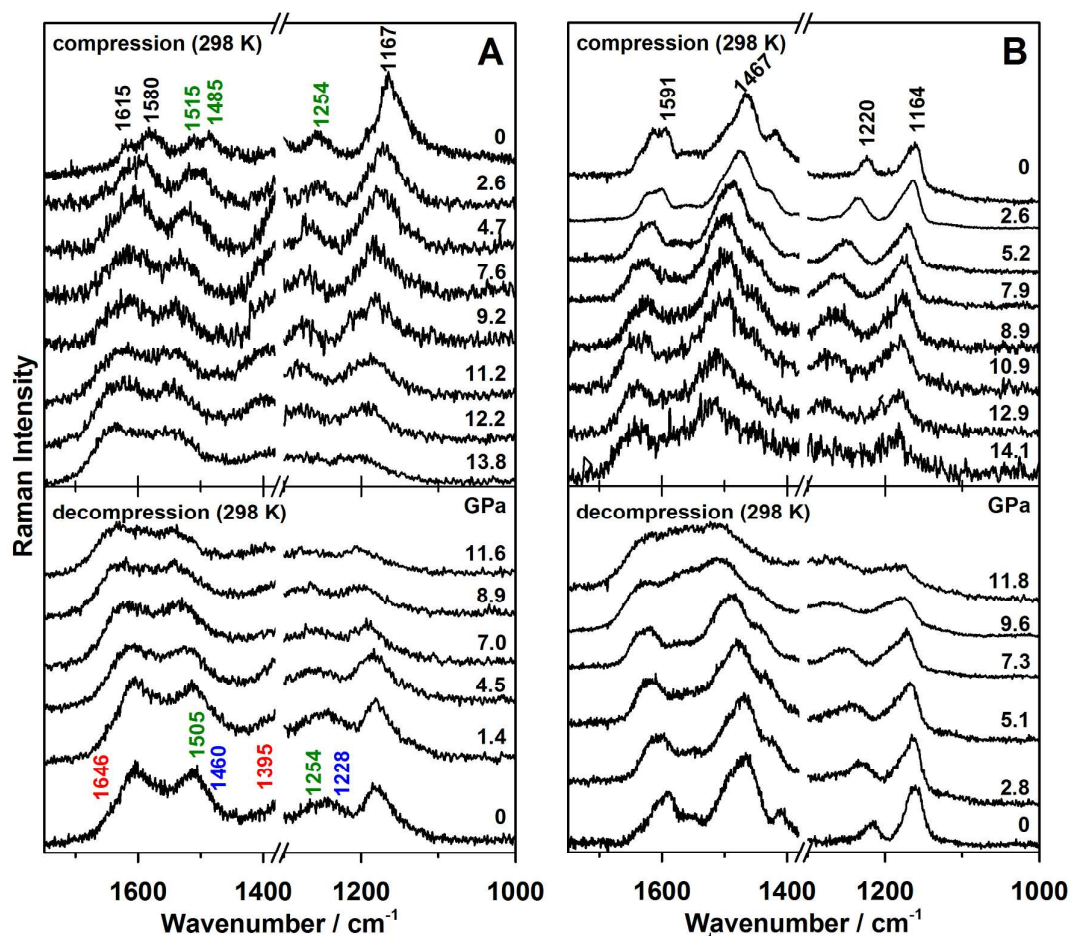

**Figure 3S.** Raman spectra of PANI-ES-RM (A) and PANI-EB-RM (B) during the compression (upper panels) and decompression (lower panels) at 298 K.

## References

1. Furukawa, Y.; Ueda, F.; Hyodo, Y.; Harada, I.; Nakajima, T.; Kawagoe, T. Vibrational-Spectra and Structure of Polyaniline. *Macromolecules* **1988**, *21* (5), 1297-1305.
2. Louarn, G.; Lapkowski, M.; Quillard, S.; Pron, A.; Buisson, J. P.; Lefrant, S. Vibrational properties of polyaniline - Isotope effects. *J. Phys. Chem.* **1996**, *100* (17), 6998-7006.

3. Gruger, A.; Novak, A.; Regis, A.; Colomban, P. Infrared and Raman-Study of Polyaniline .2. Influence of Ortho Substituents on Hydrogen-Bonding and Uv/Vis near-Ir Electron Charge-Transfer. *J. Mol. Struct.* **1994**, 328, 153-167.
